# Supplementary material for: Photoprotective Agents Obtained from Aromatic Plants Grown in Colombia: Total Phenolic Content, Antioxidant Activity, and Assessment of Cytotoxic Potential in Cancer Cell Lines of Cymbopogon flexuosus L. and Tagetes lucida Cav. Essential Oils
Source: MDPI journal article supplement (doi:10.3390/plants11131693), 2022-06-27
Supplement: s1 [file s1]

## SUPPLEMENTARY INFORMATION

# Photoprotective agents obtained from aromatic plants grown in Colombia: total phenolic content, antioxidant activity, and assessment of cytotoxic potential in cancer cell lines of *Cymbopogon flexuosus* L. and *Tagetes lucida* Cav. essential oils

Karina Caballero-Gallardo <sup>1,2</sup>, Patricia Quintero-Rincón <sup>1,2</sup>, Elena E. Stashenko <sup>3</sup> and Jesus Olivero-Verbel <sup>1\*</sup>

<sup>1</sup> Environmental and Computational Chemistry Group. School of Pharmaceutical Sciences, Zaragocilla Campus, University of Cartagena, Cartagena 130014, Colombia.

<sup>2</sup> Functional Toxicology Group. School of Pharmaceutical Sciences, Zaragocilla Campus, University of Cartagena, Cartagena 130014, Colombia.

<sup>3</sup> Center for Chromatography and Mass Spectrometry CROM-MASS, Research Center for Biomolecules CIBIMOL, School of Chemistry, Universidad Industrial de Santander, Bucaramanga 680006, Colombia.

\* Correspondence: joliverov@unicartagena.edu.co (J.O.-V.) (Tel: 318-535-9815; Fax: 57-(5)-6699771)

## Contents

- I. **Supplementary Table S1.** Cytotoxic potential (IC<sub>10</sub> and IC<sub>25</sub>) on HepG2 and Calu-1 cells.
- II. **Supplementary Table S2.** EE( $\lambda$ ) x I( $\lambda$ ) constant values to wavelength determinate.
- III. **Supplementary Table S3.** Erythema and pigmentation flux constant values on sunscreens to wavelength determinate.
- IV. **Supplementary Table S4.** Classification of sunscreen according to erythema and pigmentation transmission indices.

### I. **Supplementary Table S1.** Cytotoxic potential (IC<sub>10</sub> and IC<sub>25</sub>) on HepG2 and Calu-1 cells.

| Essential oil               | Cytotoxic potential derived of MTT viability assay (24 h) |                |         |                  |                |         |
|-----------------------------|-----------------------------------------------------------|----------------|---------|------------------|----------------|---------|
|                             | HepG2                                                     |                |         | Calu-1           |                |         |
|                             | IC <sub>10</sub>                                          | R <sup>2</sup> | p-value | IC <sub>10</sub> | R <sup>2</sup> | p-value |
| <i>Cymbopogon flexuosus</i> | 29                                                        | 0.986          | <0.0001 | 46               | 0.865          | 0.0072  |
|                             | IC <sub>25</sub>                                          | R <sup>2</sup> | p-value | IC <sub>25</sub> | R <sup>2</sup> | p-value |
|                             | 46                                                        | 0.986          | <0.0001 | 66               | 0.865          | 0.0072  |
|                             | IC <sub>10</sub>                                          | R <sup>2</sup> | p-value | IC <sub>10</sub> | R <sup>2</sup> | p-value |
| <i>Tagetes lucida</i>       | 105                                                       | 0.912          | 0.0002  | 170              | 0.856          | 0.0010  |
|                             | IC <sub>25</sub>                                          | R <sup>2</sup> | p-value | IC <sub>25</sub> | R <sup>2</sup> | p-value |
|                             | 167                                                       | 0.912          | 0.0002  | 249              | 0.856          | 0.0010  |

IC. Inhibitory concentration (μg/mL).

**II. Supplementary Table S2.**  $EE(\lambda) \times I(\lambda)$  constant values to wavelength determinate.

| Wavelength ( $\lambda$ , nm) | EE ( $\lambda$ )x I ( $\lambda$ ) |
|------------------------------|-----------------------------------|
| 290                          | 0.015                             |
| 295                          | 0.082                             |
| 300                          | 0.287                             |
| 305                          | 0.328                             |
| 310                          | 0.186                             |
| 315                          | 0.084                             |
| 320                          | 0.018                             |

**III. Supplementary Table S3.** Erythema and pigmentation flux constant values on sunscreens to wavelength determinate.

| Wavelength ( $\lambda$ ; nm) | Flux of erythema (Fe) | Flux of pigmentation (Fp) |
|------------------------------|-----------------------|---------------------------|
| 290-295                      | 11.390                |                           |
| 295-300                      | 65.100                |                           |
| 300-305                      | 100.000               |                           |
| 305-310                      | 35.770                |                           |
| 310-315                      | 0.973                 |                           |
| 315-320                      | 0.567                 |                           |
| 320-325                      | 337.500               | 10.790                    |
| 325-330                      | 0.289                 | 10.200                    |
| 330-335                      | 0.129                 | 0.936                     |
| 335-340                      | 0.046                 | 0.798                     |
| 340-345                      |                       | 0.669                     |
| 345-350                      |                       | 0.570                     |
| 350-355                      |                       | 0.488                     |
| 355-360                      |                       | 0.456                     |
| 360-365                      |                       | 0.356                     |
| 365-370                      |                       | 0.310                     |
| 370-375                      |                       | 0.260                     |
| $\Sigma$                     | 551.764               | 25.833                    |

Constant values of Fe and Fp taken and modified from Sami et al. (2021).

**IV. Supplementary Table S4.** Classification of sunscreen according to erythema and pigmentation transmission indices.

| Category         | UV transmission range (%) |              |
|------------------|---------------------------|--------------|
|                  | Erythema                  | Pigmentation |
| Sunscreen        | <1                        | 3-40         |
| Extra protection | 1-6                       | 42-86        |
| Standard tan     | 6-12                      | 45-86        |
| Quick tan        | 10-18                     | 45-86        |

## References

Sami, F.J.; Soekamto, N.H.; Latip, J. Bioactivity profile of three of seaweed as an antioxidant, UV-protection as sunscreen and their correlation activity. Food Res. **2021**, 5(1): 441-447.
